# Supplementary material for: Estrogen-induced upregulation and 3′-UTR shortening of CDC6
Source: PubMed Central journal article supplement (PMC3510512; doi:10.1093/nar/gks855), 2012-09-12
Supplement: supp_gks855_nar-01248-n-2012-File013.pdf [file supp_gks855_nar-01248-n-2012-File013.pdf]

**Supplementary Table 1. MIQE Guidelines Checklist**

| ITEM TO CHECK                                                        | IMPORTANCE | CHECKLIST | COMMENTS/<br>WHERE?                  |
|----------------------------------------------------------------------|------------|-----------|--------------------------------------|
| <b>EXPERIMENTAL DESIGN</b>                                           |            |           |                                      |
| Definition of experimental and control groups                        | E          | YES       | Materials and Methods                |
| Number within each group                                             | E          | YES       | Materials and Methods                |
| Assay carried out by core lab or investigator's lab?                 | D          | YES       | Investigator's Lab                   |
| Acknowledgement of authors' contributions                            | D          | NO        | Not required by journal              |
| <b>SAMPLE</b>                                                        |            |           |                                      |
| Description                                                          | E          | N/A       |                                      |
| Volume/mass of sample processed                                      | D          | N/A       |                                      |
| Microdissection or macrodissection                                   | E          | N/A       |                                      |
| Processing procedure                                                 | E          | N/A       |                                      |
| If frozen - how and how quickly?                                     | E          | N/A       |                                      |
| If fixed - with what, how quickly?                                   | E          | N/A       |                                      |
| Sample storage conditions and duration (especially for FFPE samples) | E          | N/A       |                                      |
| <b>NUCLEIC ACID EXTRACTION</b>                                       |            |           |                                      |
| Procedure and/or instrumentation                                     | E          | YES       | Materials and Methods                |
| Name of kit and details of any modifications                         | E          | YES       | Materials and Methods                |
| Source of additional reagents used                                   | D          | YES       | Materials and Methods                |
| Details of DNase or RNase treatment                                  | E          | YES       | Sup. Table 2                         |
| Contamination assessment (DNA or RNA)                                | E          | YES       | Sup. Fig. 1                          |
| Nucleic acid quantification                                          | E          | YES       | Materials and Methods<br>Sup. Fig. 1 |
| Instrument and method                                                | E          | YES       | Materials and Methods<br>Sup. Fig. 1 |
| Purity (A260/A280)                                                   | D          | YES       | Sup. Fig. 1                          |
| Yield                                                                | D          | YES       | Sup. Fig. 1                          |
| RNA integrity method/instrument                                      | E          | YES       | Agarose gel<br>Sup. Fig. 1           |
| RIN/RQI or Cq of 3' and 5' transcripts                               | E          | NO        |                                      |
| Electrophoresis traces                                               | D          | N/A       |                                      |
| Inhibition testing (Cq dilutions, spike or other)                    | E          | YES       | Cq dilutions<br>Sup. Fig. 3          |
| <b>REVERSE TRANSCRIPTION</b>                                         |            |           |                                      |
| Complete reaction conditions                                         | E          | YES       | Sup. Table 3                         |

|                                                           |   |     |                                                 |
|-----------------------------------------------------------|---|-----|-------------------------------------------------|
| Amount of RNA and reaction volume                         | E | YES | Materials and Methods<br>Sup. Table 3           |
| Priming oligonucleotide and concentration                 | E | YES | Materials and Methods<br>Sup. Table 3           |
| Reverse transcriptase and concentration                   | E | YES | Sup. Table 3                                    |
| Temperature and time                                      | E | YES | Sup. Table 3                                    |
| Manufacturer of reagents and catalogue numbers            | D | YES | Sup. Table 3                                    |
| Cqs with and without RT                                   | D | NO  |                                                 |
| Storage conditions of cDNA                                | D | YES | Sup. Table 3                                    |
| <b>qPCR TARGET INFORMATION</b>                            |   |     |                                                 |
| If multiplex, efficiency and LOD of each assay.           | E | N/A |                                                 |
| Sequence accession number                                 | E | YES | CDC6:NM_001254<br>SDHA:NM_004168                |
| Location of amplicon                                      | D | YES | Sup. Figure 2                                   |
| Amplicon length                                           | E | YES | Materials and Methods<br>Sup. Figure 2          |
| <i>In silico</i> specificity screen (BLAST, etc)          | E | YES | BLAST and <i>In silico</i> PCR<br>Sup. Figure 2 |
| Pseudogenes, retropseudogenes or other homologs?          | D | YES | None detected by BLASTn                         |
| Sequence alignment                                        | D | YES | Sup. Figure 2                                   |
| Secondary structure analysis of amplicon                  | D | NO  |                                                 |
| Location of each primer by exon or intron (if applicable) | E | YES | Sup. Figure 2                                   |
| What splice variants are targeted?                        | E | N/A |                                                 |
| <b>qPCR OLIGONUCLEOTIDES</b>                              |   |     |                                                 |
| Primer sequences                                          | E | YES | Materials and Methods                           |
| RTPrimerDB Identification Number                          | D | N/A |                                                 |
| Probe sequences                                           | D | N/A |                                                 |
| Location and identity of any modifications                | E | N/A |                                                 |
| Manufacturer of oligonucleotides                          | D | YES | Materials and Methods                           |
| Purification method                                       | D | YES | HPLC                                            |

|                                                           |          |            |                                       |
|-----------------------------------------------------------|----------|------------|---------------------------------------|
| <b>qPCR PROTOCOL</b>                                      |          |            |                                       |
| Complete reaction conditions                              | <b>E</b> | <b>YES</b> | Materials and Methods<br>Sup. Table 4 |
| Reaction volume and amount of cDNA/DNA                    | <b>E</b> | <b>YES</b> | Materials and Methods<br>Sup. Table 3 |
| Primer, (probe), Mg <sup>++</sup> and dNTP concentrations | <b>E</b> | <b>YES</b> | Materials and Methods                 |
| Polymerase identity and concentration                     | <b>E</b> | <b>YES</b> | Materials and Methods                 |
| Buffer/kit identity and manufacturer                      | <b>E</b> | <b>YES</b> | Materials and Methods                 |
| Exact chemical constitution of the buffer                 | <b>D</b> | <b>NO</b>  | Manufactures proprietary              |
| Additives (SYBR Green I, DMSO, etc.)                      | <b>E</b> | <b>N/A</b> |                                       |
| Manufacturer of plates/tubes and catalog number           | <b>D</b> | <b>YES</b> | Sup. Table 3                          |
| Complete thermocycling parameters                         | <b>E</b> | <b>YES</b> | Materials and Methods                 |
| Reaction setup (manual/robotic)                           | <b>D</b> | <b>YES</b> | Manual setup                          |
| Manufacturer of qPCR instrument                           | <b>E</b> | <b>YES</b> | Materials and Methods                 |
| <b>qPCR VALIDATION</b>                                    |          |            |                                       |
| Evidence of optimization (from gradients)                 | <b>D</b> |            |                                       |
| Specificity (gel, sequence, melt, or digest)              | <b>E</b> | <b>YES</b> | Melt analysis<br>Sup. Figure 3        |
| For SYBR Green I, C <sub>q</sub> of the NTC               | <b>E</b> | <b>YES</b> | Sup. Figure 3                         |
| Standard curves with slope and y-intercept                | <b>E</b> | <b>YES</b> | Sup. Figure 3                         |
| PCR efficiency calculated from slope                      | <b>E</b> | <b>YES</b> | Sup. Figure 3                         |
| Confidence interval for PCR efficiency or standard error  | <b>D</b> | <b>N/A</b> |                                       |
| r <sup>2</sup> of standard curve                          | <b>E</b> | <b>YES</b> | Sup. Figure 3                         |
| Linear dynamic range                                      | <b>E</b> | <b>YES</b> | Sup. Figure 3                         |
| C <sub>q</sub> variation at lower limit                   | <b>E</b> | <b>YES</b> | Sup. Figure 3                         |
| Confidence intervals throughout range                     | <b>D</b> | <b>N/A</b> |                                       |
| Evidence for limit of detection                           | <b>E</b> | <b>NO</b>  |                                       |
| If multiplex, efficiency and LOD of each assay.           | <b>E</b> | <b>N/A</b> |                                       |
| <b>DATA ANALYSIS</b>                                      |          |            |                                       |
| qPCR analysis program (source, version)                   | <b>E</b> | <b>YES</b> | Materials and Methods                 |
| C <sub>q</sub> method determination                       | <b>E</b> | <b>YES</b> | Materials and Methods                 |
| Outlier identification and disposition                    | <b>E</b> | <b>N/A</b> |                                       |
| Results of NTCs                                           | <b>E</b> | <b>YES</b> | Sup. Figure 3                         |
| Justification of number and choice of reference genes     | <b>E</b> | <b>YES</b> | Materials and Methods                 |
| Description of normalization method                       | <b>E</b> | <b>YES</b> | Standard curve quantification         |
| Number and concordance of biological replicates           | <b>D</b> | <b>YES</b> | Materials and                         |

|                                                       |          |            |                       |
|-------------------------------------------------------|----------|------------|-----------------------|
|                                                       |          |            | Methods               |
| Number and stage (RT or qPCR) of technical replicates | <b>E</b> | <b>YES</b> | Materials and Methods |
| Repeatability (intra-assay variation)                 | E        | <b>YES</b> | Materials and Methods |
| Reproducibility (inter-assay variation, %CV)          | D        | <b>NO</b>  |                       |
| Power analysis                                        | D        | <b>NO</b>  |                       |
| Statistical methods for result significance           | <b>E</b> | <b>YES</b> | Biological replicates |
| Software (source, version)                            | E        | <b>YES</b> | Materials and Methods |
| Cq or raw data submission using RDML                  | <b>D</b> | <b>N/A</b> |                       |

E: Essential information, D: Desirable information, N/A: Not applicable

**Supplementary Table 2. DNase Treatment**

| Components                                                                                                                                     | Amount    |
|------------------------------------------------------------------------------------------------------------------------------------------------|-----------|
| Total RNA                                                                                                                                      | 10 µg     |
| 10X Incubation Buffer<br>(400 mM Tris-HCl, 100 mM NaCl, 60 mM MgCl <sub>2</sub> , 10 mM CaCl <sub>2</sub> , pH 7.9)                            | 10 µL     |
| DNase I recombinant, RNase-free (10 units/µl)<br>Roche Applied Sciences Cat. No. 04 716 728 001                                                | 1 µL      |
| RiboLock™ RNase Inhibitor (20u/µL)<br>Fermentas #EO0381<br>*One unit of RiboLock™ RNase Inhibitor inhibits the activity of 5 ng RNase A by 50% | 1 µL      |
| RNase-free Water                                                                                                                               | To 100 µL |
| DNase treatment was done at 37° C for 60 min. Reaction was terminated by phenol/chloroform extraction.                                         |           |

**Supplementary Table 3. Reaction Conditions of Reverse Transcription**

| Components                                                                                                                                                                              | Amount   |
|-----------------------------------------------------------------------------------------------------------------------------------------------------------------------------------------|----------|
| Total RNA                                                                                                                                                                               | 2 µg     |
| Oligo(dT) <sub>18</sub> primer (100 µM 0.5 µg/µl (15 A260 u/ml) )                                                                                                                       | 1 µL     |
| 5X Reaction Buffer<br>(250 mM Tris-HCl (pH 8.3), 250 mM KCl, 20 mM MgCl <sub>2</sub> , 50 mM DTT)                                                                                       | 4 µL     |
| 10 mM dNTP mix                                                                                                                                                                          | 2 µL     |
| RiboLock™ RNase Inhibitor (20u/µL)<br>*One unit of RiboLock™ RNase Inhibitor inhibits the activity of 5 ng RNase A by 50%                                                               | 1 µL     |
| RevertAid™ M-MuLV Reverse Transcriptase (200u/µL)<br>*One unit of RevertAid™ M-MuLV RT incorporates 1 nmol of dTMP into a polynucleotide fraction (adsorbed on DE-81) in 10 min at 37°C | 1 µL     |
| Nuclease-free water                                                                                                                                                                     | to 20 µL |
| cDNA was synthesized at 42° C for 60 minutes. Reaction was terminated by keeping at 70° C for 5 minutes. cDNA samples were stored at -20° C.                                            |          |

**Supplementary Table 4. Reaction Conditions for RT-qPCR**

| Components                                                               | Amount      |
|--------------------------------------------------------------------------|-------------|
| Fast Start SYBR Green Master                                             | 10 $\mu$ L  |
| Forward Primer (5 $\mu$ M)                                               | 1.2 $\mu$ L |
| Reverse Primer (5 $\mu$ M)                                               | 1.2 $\mu$ L |
| cDNA (1:49 diluted from stock cDNA)                                      | 4 $\mu$ L   |
| PCR Grade water                                                          | 3.6 $\mu$ L |
| Total volume                                                             | 20 $\mu$ L  |
| PCR tubes (0.2 mL, thin wall, flat cap, Greiner catalog number Z617687). |             |

**A.**

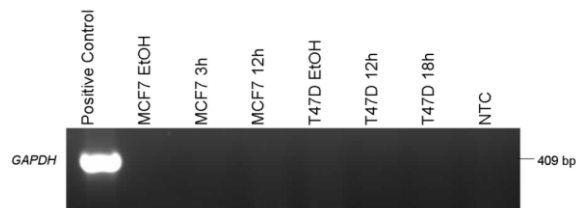

**B.**

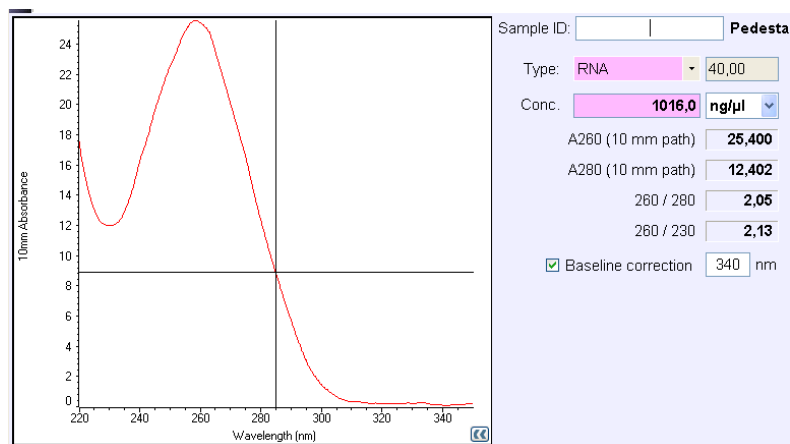

**C.**

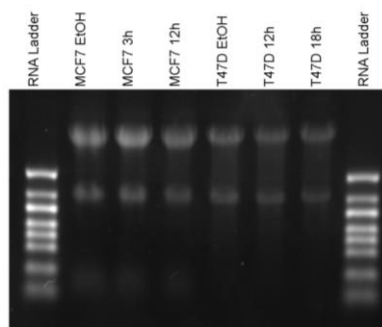

### Supplementary Figure 1. DNA contamination, quantification and integrity assessment

**A.** Lack of DNA contamination in RNA samples was assessed and shown by PCR using *GAPDH* specific primers. *GAPDH\_F*: 5'-GGGAGCCAAAAGGGTCATCA-3' and *GAPDH\_R*: 5'-TTTCTAGACGGCAGGTCA GGT-3' (product size: 409 bp). Following conditions were used for the PCR reactions: incubation at 94°C for 10 minutes, 40 cycles of 94°C for 30 seconds, 56°C for 30 seconds, and 72°C for 30 seconds, and final extension at 72°C for 5 minutes. MCF7 cDNA was used as a positive control. **B.** RNA concentrations (A260) were determined using NanoDrop ND1000 (Thermo Scientific). Purity was determined by A260/A280 and A260/A230 ratios (all RNA samples were around 2.0 for A260/A280, and A260/A230 ratios) **C.** RNA integrity was assessed by running the RNA samples on a 0.7 % Formaldehyde RNA Gel (10X MOPS, 37% Formaldehyde, DEPC-water)



A. [ref|NM\\_001254.3|](#) **UEGM** Homo sapiens cell division cycle 6 homolog (S. cerevisiae) (CDC6), mRNA  
 Length=3053

**GENE ID: 990 CDC6** | cell division cycle 6 homolog (S. cerevisiae)  
 [Homo sapiens] ([Over 10 PubMed links](#))

Score = 342 bits (185), Expect = 9e-92  
 Identities = 185/185 (100%), Gaps = 0/185 (0%)  
 Strand=Plus/Plus

```

Query 1   TTCAGCTGGCAITTAGAGAGCTACAGICTTCAITTTAGTGCITTTACACAITCGGGCCTGA 60
          |||
Sbjct 1923 TTCAGCTGGCAITTAGAGAGCTACAGICTTCAITTTAGTGCITTTACACAITCGGGCCTGA 1982

Query 61   AAACAAATATGACCTTTTTTACTTGAAGCCAATGAATTTAATCTATAGATTCTTTAATA 120
          |||
Sbjct 1983 AAACAAATATGACCTTTTTTACTTGAAGCCAATGAATTTAATCTATAGATTCTTTAATA 2042

Query 121  TTAGCACAGAATAATATCTTTGGGTCTTACTATTTTACCATAAAAAGTGACCAGGTAGA 180
          |||
Sbjct 2043 TTAGCACAGAATAATATCTTTGGGTCTTACTATTTTACCATAAAAAGTGACCAGGTAGA 2102

Query 181  CCCTT 185
          |||
Sbjct 2103 CCCTT 2107
  
```

#### UCSC In-Silico PCR

```

>chr17:38458283+38458467 185bp TTCAGCTGGCAITTAGAGAGC AAGGGTCTACCTGGTCACTTTT
TTCAGCTGGCAITTAGAGAGCtacagtcttcatttttagtgctttacacat
tcgggcctgaaaacaatatgacctttttacttgaagccaatgaatttt
aatctatagattcttttaatatgacacagaataaatcttttgggtcttac
tatttttaccatAAAAGTGACCAGGTAGACCTT
  
```

#### Primer Melting Temperatures

Forward: 59.7 C ttcagctggcatttagagagc  
 Reverse: 58.2 C aagggtctacotggtoactttt

The temperature calculations are done assuming 50 mM salt and 50 nM annealing oligo concentration. The code to calculate the melting temp comes from [Primer3](#).

**UCSC Genome Browser on Human Feb. 2009 (GRCh37/hg19) Assembly**

move <<< << < > >> >>> zoom in 1.5x 3x 10x base zoom out 1.5x 3x 10x

position/search  gene  jump clear size 185 bp. configure

chr17 (q21.2) 13.1 17p12 17p11.2 q11.2 17q12 17q22 24.3 25.1 q25.3

Scale 50 bases hg19  
 chr17: 38,458,300 | 38,458,350 | 38,458,400 | 38,458,450

Your Sequence from PCR Search

CDC6 UCSC Genes (RefSeq, UniProt, CCDS, Rfam, tRNAs & Comparative Genomics)

B.

>[ref|NM\\_001254.3|](#) **UEGM** Homo sapiens cell division cycle 6 homolog (S. cerevisiae) (CDC6), mRNA  
Length=3053

[GENE ID: 990 CDC6](#) | cell division cycle 6 homolog (S. cerevisiae)  
[Homo sapiens] ([Over 10 PubMed links](#))

Score = 645 bits (349), Expect = 0.0  
Identities = 349/349 (100%), Gaps = 0/349 (0%)  
Strand=Plus/Plus

```
Query 1 TTCAGCTGGCATTAGAGAGCTACAGTCTTCATTTTAGTGCCTTACACATTCGGGCCTGA 60
      |||
Sbjct 1923 TTCAGCTGGCATTAGAGAGCTACAGTCTTCATTTTAGTGCCTTACACATTCGGGCCTGA 1982

Query 61 AAACAAATATGACCTTTTTTACTTGAAGCCAATGAATTTTAAICTATAGATTCTTTAATA 120
      |||
Sbjct 1983 AAACAAATATGACCTTTTTTACTTGAAGCCAATGAATTTTAAICTATAGATTCTTTAATA 2042

Query 121 TTAGCACAGAATAATATCTTTGGGICTTACTATTTTTACCATAAAAAGTGACCAGGTAGA 180
      |||
Sbjct 2043 TTAGCACAGAATAATATCTTTGGGICTTACTATTTTTACCATAAAAAGTGACCAGGTAGA 2102

Query 181 CCCTTTTAAATTACATTCACTACTTCTACCCTTGTGTATCTCTAGCCAATGTGCTTGCA 240
      |||
Sbjct 2103 CCCTTTTAAATTACATTCACTACTTCTACCCTTGTGTATCTCTAGCCAATGTGCTTGCA 2162

Query 241 AGTGTACAGATCTGTGTAGAGGAAIGTGTGTATATTTACCTCTTCGTTTGCTCAAAACATG 300
      |||
Sbjct 2163 AGTGTACAGATCTGTGTAGAGGAAIGTGTGTATATTTACCTCTTCGTTTGCTCAAAACATG 2222

Query 301 AGTGGGTATTTTTTGTGTTTTTTTTGTTGTTGTTGTTGTTGTTGTTGAGGCG 349
      |||
Sbjct 2223 AGTGGGTATTTTTTGTGTTTTTTTTGTTGTTGTTGTTGTTGTTGTTGAGGCG 2271
```

#### UCSC In-Silico PCR

```
>chr17:38458283+38458631 349bp TTCAGCTGGCATTAGAGAGC CGCCTCAAAAACAACAACA
TTCAGCTGGCATTAGAGAGCtacagtcctcattttagtgctttacacat
tcgggctgaaacaaatgatgacctttttacttgaagccaatgaattt
aatctatagattctttaataattagcacagaataaatctttgggtcttac
tattttaccataaaaagtgaccaggtagacccttttaattacattcac
tactttaccactgtgtatctctagccaatgtgctgcaaggtacaga
tctgtgtagaggaatgtgtatatttacctcttctgcttgcacaaacatg
agtgggtattttttgtgTTTTTTTTGTTGTTGTTGTTGTTGTTGAGGCG
```

#### Primer Melting Temperatures

Forward: 59.7 C ttcagctggcatttagagagc  
Reverse: 59.7 C cgcccaaaaacaacaaca

The temperature calculations are done assuming 50 mM salt and 50 nM annealing oligo concentration. The code to calculate the melting temp comes from [Primer3](#).

### UCSC Genome Browser on Human Feb. 2009 (GRCh37/hg19) Assembly

move <<< << < > >> >>> zoom in 1.5x 3x 10x base zoom out 1.5x 3x 10x

position/search     size 349 bp.

chr17 (q21.2) | 13.1 | 17p12 | 17p11.2 | **q11.2** | 17q12 | 17q22 | 24.3 | 25.1 | q25.3 |

Scale 100 bases | hg19  
chr17: | 38,458,350 | 38,458,400 | 38,458,450 | 38,458,500 | 38,458,550 | 38,458,600 |  
Your Sequence from PCR Search  
CDC6

C.

```
>ref|NM_004168.2| UEGM Homo sapiens succinate dehydrogenase complex, subunit A, flavoprotein (Fp) (SDHA), nuclear gene encoding mitochondrial protein, mRNA
Length=2405
```

```
GENE ID: 6389 SDHA | succinate dehydrogenase complex, subunit A, flavoprotein (Fp) [Homo sapiens] (Over 10 PubMed links)
```

```
Score = 159 bits (86), Expect = 3e-37
Identities = 86/86 (100%), Gaps = 0/86 (0%)
Strand=Plus/Plus
```

```
Query 1 TGGGAACAAGAGGGCATCTGCTAAAGTTTCAGATTCATTCTGCTCAGTATCCAGTAGT 60
      |||
Sbjct 229 TGGGAACAAGAGGGCATCTGCTAAAGTTTCAGATTCATTCTGCTCAGTATCCAGTAGT 288

Query 61 GGATCATGAATTGATGAGTGGTGG 86
      |||
Sbjct 289 GGATCATGAATTGATGAGTGGTGG 314
```

### Supplementary Figure 2. *In silico* specificity screens.

*In silico* specificity of PCRs was assessed by BLAST (NCBI), amplicon lengths were confirmed using USCS *in silico* PCR tool, and chromosomal locations of amplicons are shown with Genome Browser of USCS for **A.** CDC6 Short primers, **B.** CDC6 Long primers, and **C.** SDHA primers (SDHA primers were designed from exon-exon boundaries)

A.

### Melt Analysis for CDC6\_Short primers

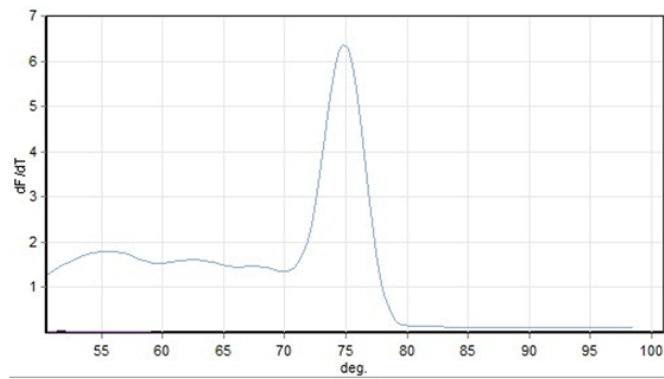

| No | Colou  | Name           | Genot | Peak | Peak | Peak | Peak | Peak | Peak | Peak | Peak | Peak | Peak |
|----|--------|----------------|-------|------|------|------|------|------|------|------|------|------|------|
| r  |        |                | ype   | 1    | 2    | 3    | 4    | 5    | 6    | 7    | 8    | 9    | 10   |
| 1  | Blue   | CDC6 Short     |       | 55,5 | 62,5 | 67,5 | 74,8 | 87,0 | 97,0 |      |      |      |      |
| 2  | Purple | CDC6 Short NTC |       | 51,7 | 57,0 | 61,7 | 67,2 | 72,7 | 76,0 | 81,8 | 87,0 | 92,5 | 97,0 |

### Raw Data For Cycling A.Green

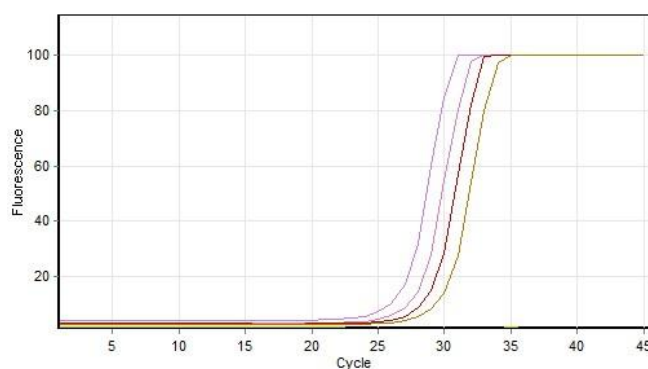

### Quantitation data for Cycling A.Green

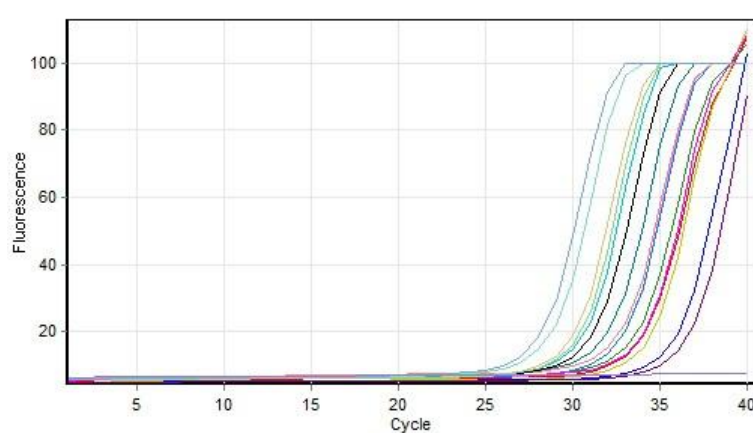

## Standard Curve

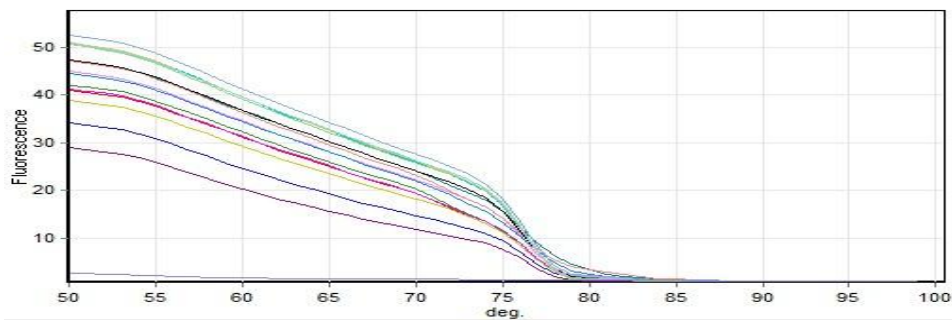

| No. | Colour        | Name             | Type     | Ct    | Given Conc (copies/ul) | Calc Conc (copies/ul) | % Var |
|-----|---------------|------------------|----------|-------|------------------------|-----------------------|-------|
| 18  | Light Purple  | Std 1_CDC6 Short | Standard | 22,84 | 100.000                | 100.501               | 0,5%  |
| 19  | Medium Purple | Std 2_CDC6 Short | Standard | 23,85 | 50.000                 | 48.956                | 2,1%  |
| 20  | Red           | Std 3_CDC6 Short | Standard | 24,75 | 25.000                 | 25.689                | 2,8%  |
| 21  | Gold          | Std 4_CDC6 Short | Standard | 25,77 | 12.500                 | 12.362                | 1,1%  |
| 34  | Dark Purple   | NTC_CDC6 Short   | NTC      |       |                        |                       |       |

### Quantitation Information

|                               |                                            |
|-------------------------------|--------------------------------------------|
| Threshold                     | 0,1232                                     |
| Left Threshold                | 1,000                                      |
| Standard Curve Imported       | No                                         |
| Standard Curve (1)            | conc= 10 <sup>^</sup> (-0,311*CT + 12,108) |
| Standard Curve (2)            | CT = -3,215*log(conc) + 38,925             |
| Reaction efficiency (*)       | 1,04669 (* = 10 <sup>^</sup> (-1/m) - 1)   |
| M                             | -3,21489                                   |
| B                             | 38,92467                                   |
| R Value                       | 0,99972                                    |
| R <sup>2</sup> Value          | 0,99945                                    |
| Start normalising from cycle  | 1                                          |
| Noise Slope Correction        | No                                         |
| No Template Control Threshold | 0%                                         |
| Reaction Efficiency Threshold | Disabled                                   |
| Normalisation Method          | Dynamic Tube Normalisation                 |
| Digital Filter                | Light                                      |
| Sample Page                   | Page 1                                     |
| Imported Analysis Settings    |                                            |

B.

### Melt Analysis for CDC6\_Long primers

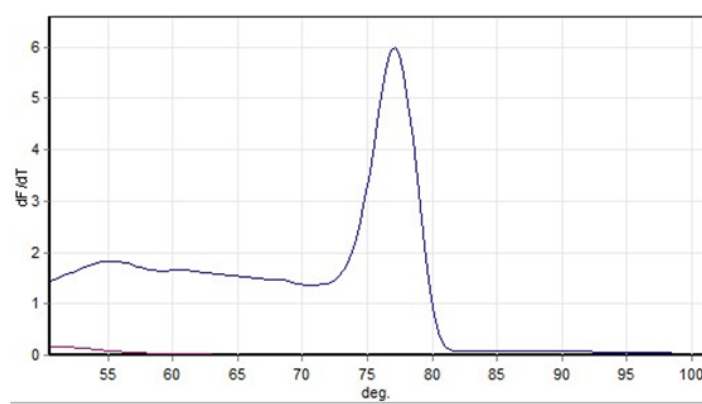

| No. | Colour  | Name          | Genotype | Peak 1 | Peak 2 | Peak 3 | Peak 4 | Peak 5 | Peak 6 |
|-----|---------|---------------|----------|--------|--------|--------|--------|--------|--------|
| 1   | Blue    | CDC6 Long     |          | 55,3   | 60,5   | 77,0   | 83,0   | 90,3   | 95,5   |
| 2   | Magenta | CDC6 Long NTC |          | 68,0   | 74,8   | 82,5   | 87,0   | 91,2   | 94,5   |

### Raw Data For Cycling A.Green

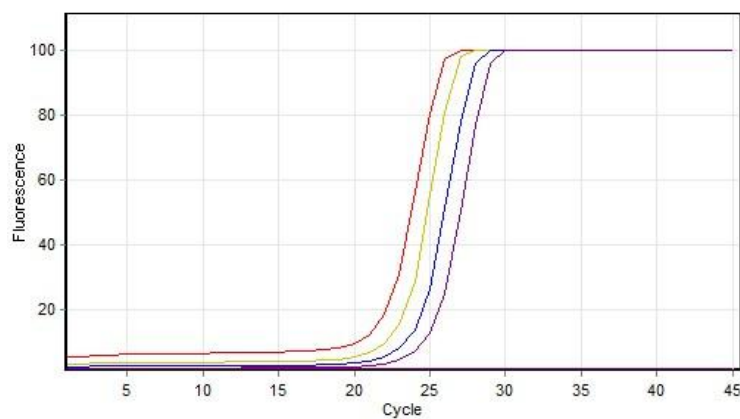

### Quantitation data for Cycling A.Green

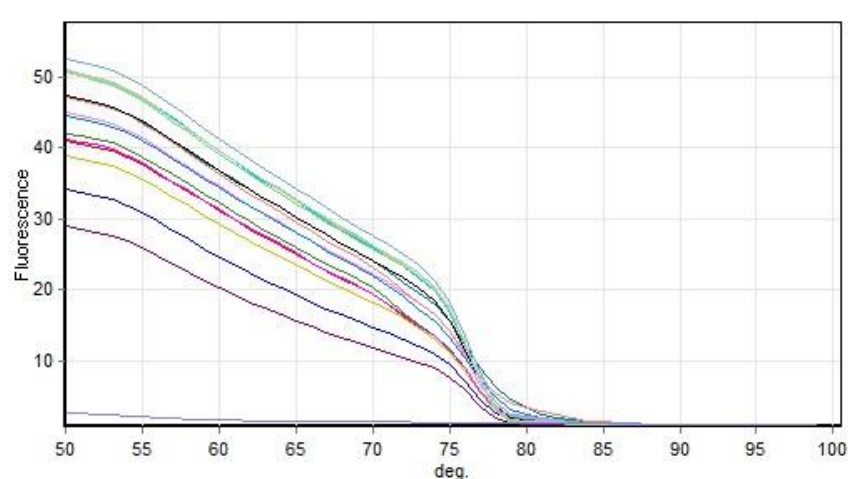

### Standard Curve

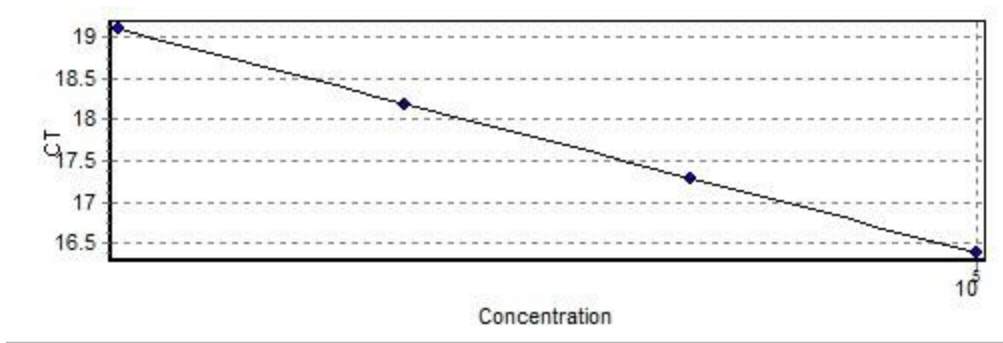

| No. | Colour | Name            | Type     | Ct    | Given Conc (copies/ul) | Calc Conc (copies/ul) | % Var |
|-----|--------|-----------------|----------|-------|------------------------|-----------------------|-------|
| 1   | Red    | Std 1_CDC6 Long | Standard | 16,39 | 100.000                | 99.959                | 0,0%  |
| 2   | Yellow | Std 2_CDC6 Long | Standard | 17,29 | 50.000                 | 49.894                | 0,2%  |
| 3   | Blue   | Std 3_CDC6 Long | Standard | 18,19 | 25.000                 | 25.137                | 0,5%  |
| 4   | Purple | Std 4_CDC6 Long | Standard | 19,10 | 12.500                 | 12.463                | 0,3%  |
| 36  | Purple | NTC             | NTC      |       |                        |                       |       |

### Quantitation Information

|                               |                                            |
|-------------------------------|--------------------------------------------|
| Threshold                     | 0,0554                                     |
| Left Threshold                | 1,000                                      |
| Standard Curve Imported       | No                                         |
| Standard Curve (1)            | conc= 10 <sup>^</sup> (-0,333*CT + 10,465) |
| Standard Curve (2)            | CT = -2,999*log(conc) + 31,384             |
| Reaction efficiency (*)       | 1,15494 (* = 10 <sup>^</sup> (-1/m) - 1)   |
| M                             | -2,99908                                   |
| B                             | 31,3844                                    |
| R Value                       | 0,99999                                    |
| R^2 Value                     | 0,99998                                    |
| Start normalising from cycle  | 1                                          |
| Noise Slope Correction        | No                                         |
| No Template Control Threshold | 0%                                         |
| Reaction Efficiency Threshold | Disabled                                   |
| Normalisation Method          | Dynamic Tube Normalisation                 |
| Digital Filter                | Light                                      |
| Sample Page                   | Page 1                                     |
| Imported Analysis Settings    |                                            |

C.

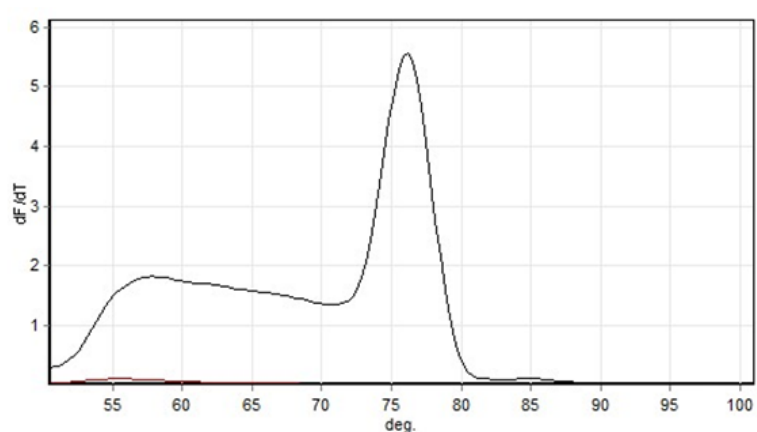

| No. | Colour | Name    | Genotype | Peak 1 | Peak 2 | Peak 3 | Peak 4 | Peak 5 | Peak 6 | Peak 7 |
|-----|--------|---------|----------|--------|--------|--------|--------|--------|--------|--------|
| 1   | ■      | SDHA    |          | 58,0   | 76,0   | 85,0   |        |        |        |        |
| 2   | ■      | SDHANTC |          | 55,3   | 66,7   | 75,3   | 81,5   | 85,5   | 90,3   | 96,5   |

**Raw Data For Cycling A.Green**

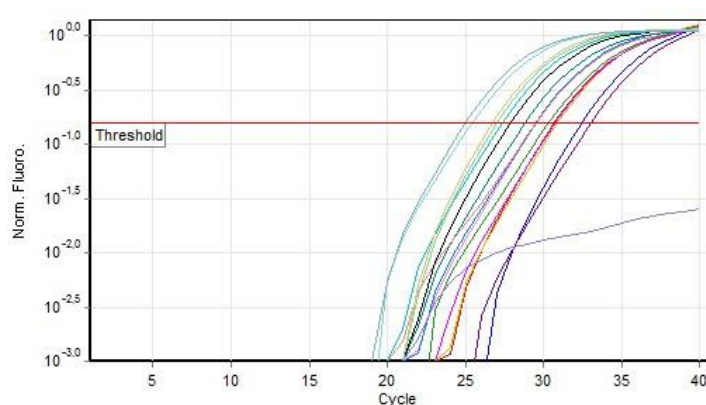

**Quantitation data for Cycling A.Green**

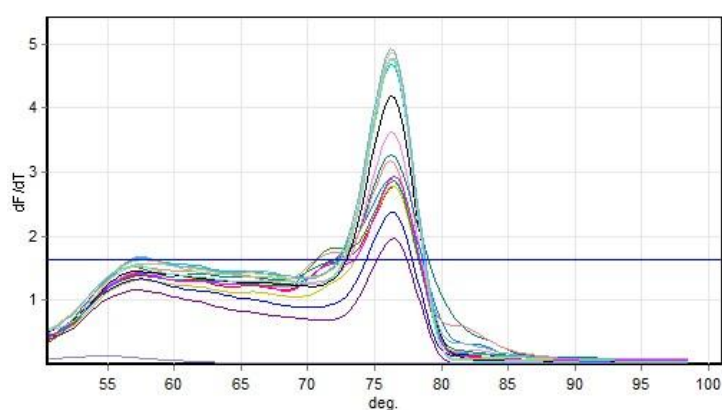



## Standard Curve

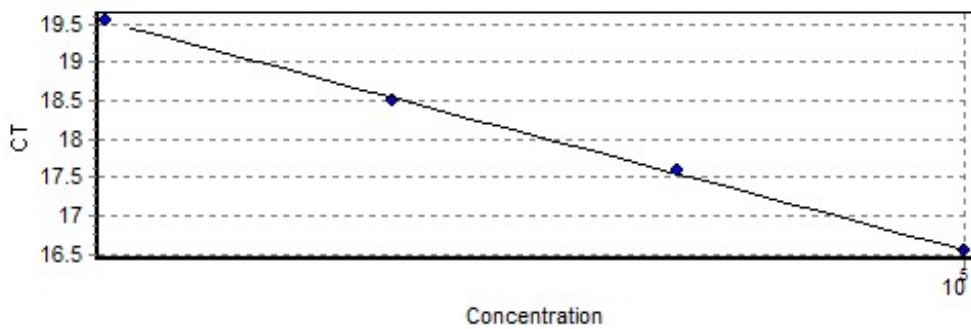

| No. | Colour | Name  | Type     | Ct    | Given Conc (copies/ul) | Calc Conc (copies/ul) | % Var |
|-----|--------|-------|----------|-------|------------------------|-----------------------|-------|
| 1   | Red    | Std 1 | Standard | 16,54 | 100.000                | 100.703               | 0,7%  |
| 2   | Yellow | Std 2 | Standard | 17,58 | 50.000                 | 48.899                | 2,2%  |
| 3   | Blue   | Std 3 | Standard | 18,50 | 25.000                 | 25.594                | 2,4%  |
| 4   | Purple | Std 4 | Standard | 19,54 | 12.500                 | 12.397                | 0,8%  |
| 5   | Grey   | NTC   | NTC      |       |                        |                       |       |

## Quantitation Information

|                               |                                                        |
|-------------------------------|--------------------------------------------------------|
| Threshold                     | 0,111                                                  |
| Left Threshold                | 1,000                                                  |
| Standard Curve Imported       | No                                                     |
| Standard Curve (1)            | $\text{conc} = 10^{(-0,303 \cdot \text{CT} + 10,019)}$ |
| Standard Curve (2)            | $\text{CT} = -3,298 \cdot \log(\text{conc}) + 33,039$  |
| Reaction efficiency (*)       | 1,01023 (* = $10^{(-1/m)} - 1$ )                       |
| M                             | -3,29766                                               |
| B                             | 33,03911                                               |
| R Value                       | 0,99976                                                |
| R^2 Value                     | 0,99952                                                |
| Start normalising from cycle  | 1                                                      |
| Noise Slope Correction        | No                                                     |
| No Template Control Threshold | 0%                                                     |
| Reaction Efficiency Threshold | Disabled                                               |
| Normalisation Method          | Dynamic Tube Normalisation                             |
| Digital Filter                | Light                                                  |
| Sample Page                   | Page 1                                                 |
| Imported Analysis Settings    |                                                        |

### Supplementary Figure 3. RT-qPCR assay performance in accordance with MIQE guidelines.

Specificity of primers and the amplified PCR products was examined by melt analysis, raw data, quantitation data, standard curves, and quantitation information calculated by Rotor Gene Software for **A.** *CDC6* Short primers, **B.** *CDC6* Long primers, and **C.** *SDHA* primers. PCR efficiencies were calculated from slope, and  $r^2$ .

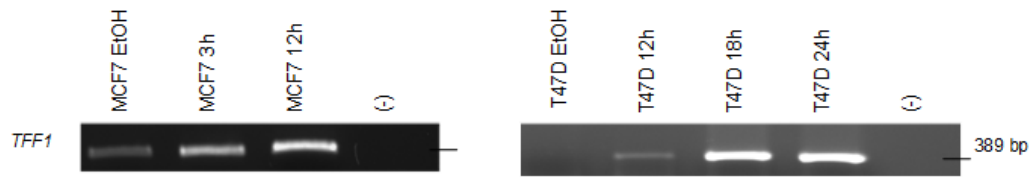

**Supplementary Figure 4. *TFF1* is an E2 upregulated gene.**

MCF7 and T47D cells were treated with ethanol or 10 nM E2 for indicated time points and RNA was isolated. Following DNase treatment, cDNA was synthesized for RT-PCR analysis. E2 treatment resulted with the upregulation of *TFF1* expression detected by RT-PCR

CDC6 1959 AGTGCTTTACACATTCGGGCCTGAAAACAAATATGACCTTTTTTACTTGAAGCCAATGAA  
CDC6 2019 TTTTAATCTATAGATTCTTTAATATTAGCACAGAATAATATCTTTGGGTCTTACTATTTT  
CDC6 2079 TACCCATAAAAAGTGACCAGGTAGACCCTTTTTAATTACATTCACTACTTCTACCACTTGT  
CDC6 2139 GTATCTCTAGCCAATGTGCTTGCAAGTGTACAGATCTGTGTAGAGGAATGTGTGTATATT  
CDC6 2199 TACCTCTTCGTTTGCTCAAACATGAGTGGGTATTTTTTGTNNAAAAAAAAAAAAAN  
P-pA-Site

**Supplementary Figure 5.** Sequencing of the 3' RACE product (size: 355 bp) revealed the existence of the proximal polyA tail.

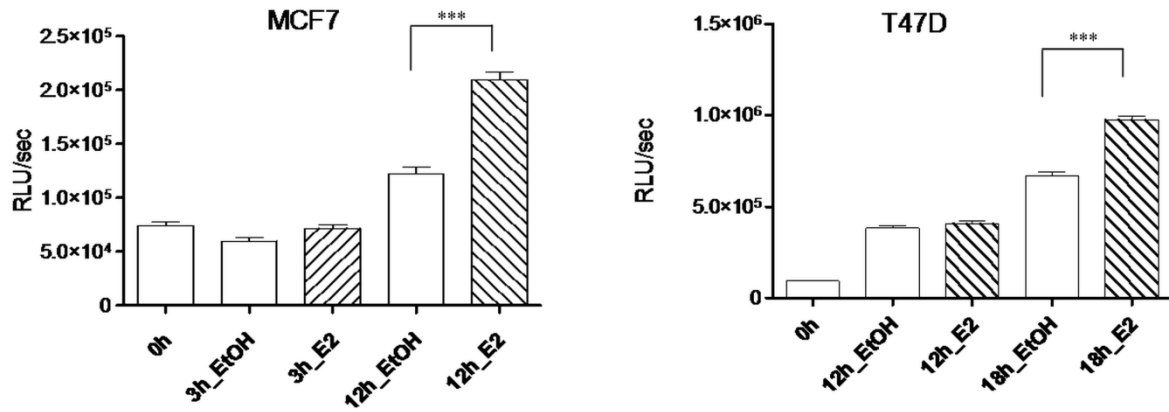

**Supplementary Figure 6.** E2 treatment induced increased BrdU incorporation. Asynchronous MCF7 and T47D cells were grown in phenol red-free media supplemented with 10% dextran-coated-charcoal stripped FBS for 48 hours. Then, cells were treated with BrdU (10 nM) and E2 (10 nM) for the indicated time points along with the ethanol treated controls (EtOH). Incorporated BrdU was detected using the Turner Biosystems Luminometer. Values are given as relative light units (RLU) per sec at respective time points. \*\*\* indicates statistical significance,  $p < 0.001$  (One way ANOVA followed by Tukey's multiple comparison test).

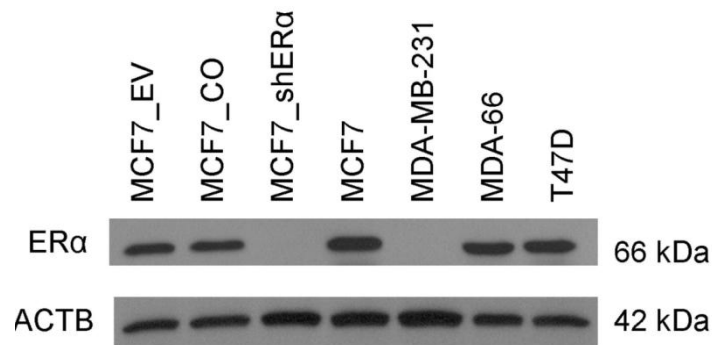

**Supplementary Figure 7.** ER protein levels detected in cell lines used in the study. MCF7\_EV cells were stably transfected with empty vector (pSR), MCF7\_CO cells were transfected with control shRNA (20), and MCF7\_shERα cells were transfected with ERα shRNA (18). MDA-66 cells are MDA-MB-231 cells that were stably transfected with ER (18, 19). MCF7, MDA-MB-231 and T47D cells were used throughout the study as ER+ cells. 50 ug lysate were loaded on 8% PAGE. β-actin was used as a protein loading control.

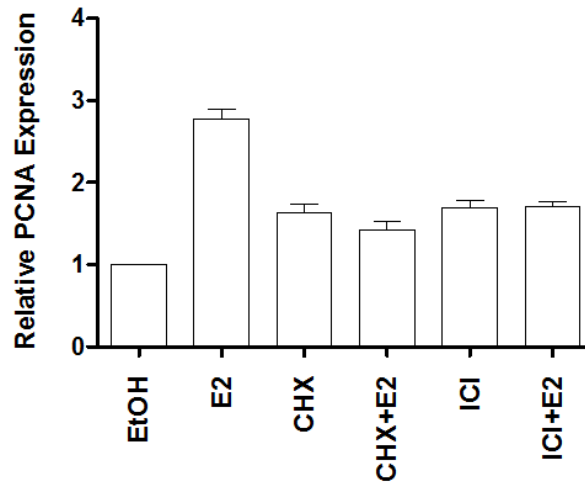

**Supplementary Figure 8.** *PCNA* expression detected by RT-qPCR after ICI and CHX treatments. MCF7 cells were grown in phenol red-free medium supplemented with 10% dextran-coated-charcoal stripped FBS, pre-treated with 1  $\mu$ M ICI or 10  $\mu$ g/mL CHX (Cycloheximide) for 1 hour, then with 10 nM E2 for 12 hours. The baseline for the control treated samples was set to 1. *PCNA* (NM\_002592) was amplified using the following primer set; *PCNA\_F*: 5'-TGCAGATGTACCCCTTGTTG-3', *PCNA\_R*: 5'-GCTGGCATCTTAGAAGCAGTT-3'. Following conditions were used: incubation at 94°C for 10 minutes, 40 cycles of 94°C for 15 seconds, 56°C for 30 seconds, and 72°C for 30 seconds.

A.

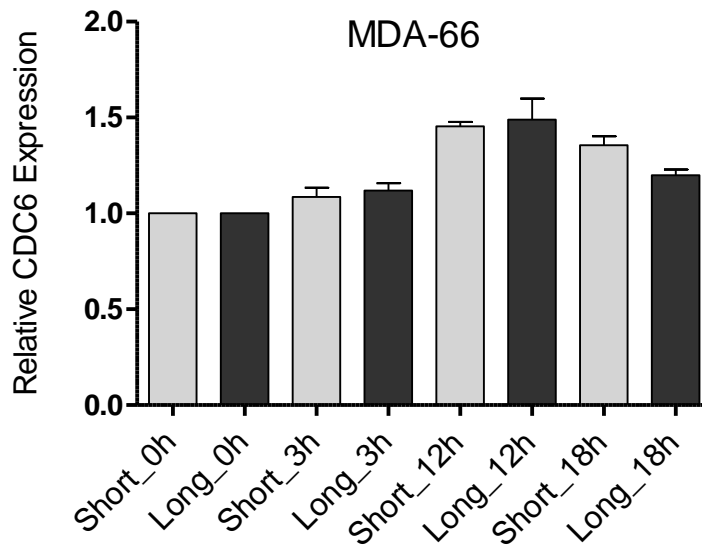

B.

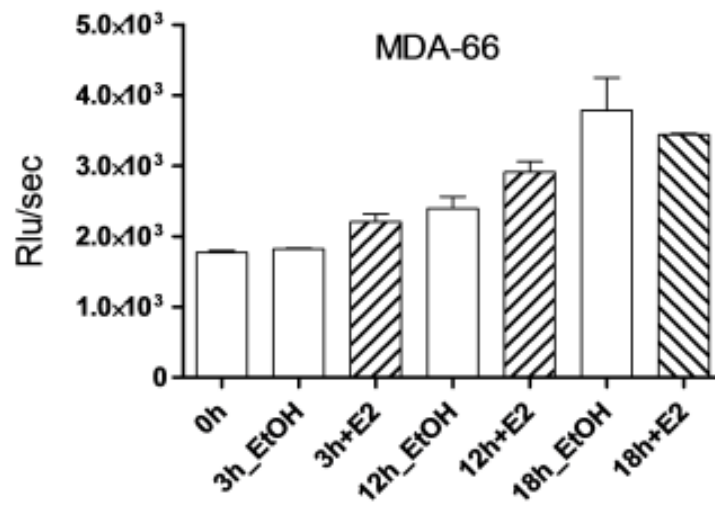

C.

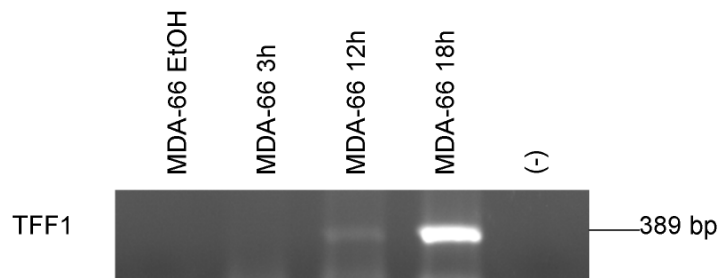

**Supplementary Figure 9. A.** Relative quantification of *CDC6* 3' UTR short and long isoforms in MDA-66 cells (ER transfected MDA-MB-231) (19). Cells were treated with E2 as described in the Methods section. E2 is known not to have a growth proliferative effect on ER transfected MDA-MB-231 cells (34-37). **B.** E2 treatment did not induce increased BrdU incorporation. Asynchronous MDA-66 cells were grown in phenol red-free media supplemented with 10% dextran-coated-charcoal stripped FBS for 48 hours. Then, cells were treated with BrdU (10 nM) and E2 (10 nM) for the indicated time points along with the ethanol treated controls (EtOH). Incorporated BrdU was detected using the Turner Biosystems Luminometer. Values are given as relative light units (RLU) per sec at respective time points. **C.** *TFF1* is an E2 upregulated gene. MDA-66 cells were treated with ethanol or 10 nM E2 for indicated time points and RNA was isolated. Following DNase treatment, cDNA was synthesized for RT-PCR analysis. E2 treatment resulted with the upregulation of *TFF1* expression.



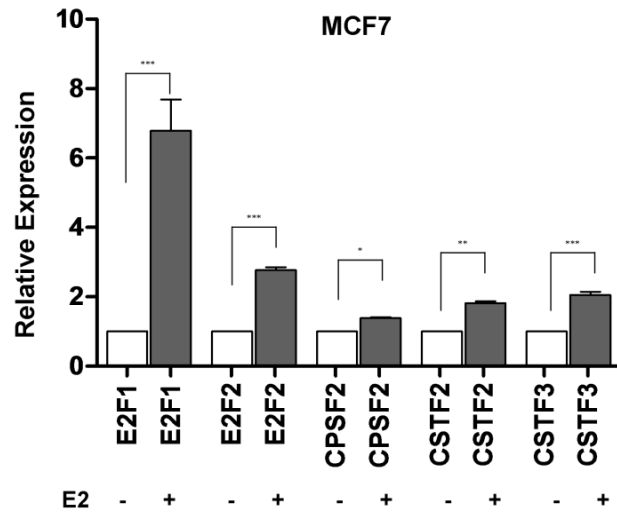

**Supplementary Figure 10.** *E2F1*, *E2F2* and 3' UTR processing gene transcripts (*CSTF2* (cleavage stimulation factor, 3' pre-RNA, subunit 2), *CSTF3* (cleavage stimulation factor, 3' pre-RNA, subunit 3) and *CPSF2* (cleavage and polyadenylation specific factor 2) are upregulated in response to E2 treatment in MCF7 cells. Cells were treated with E2 and cDNA was prepared as described in Methods. The fold change for the transcripts was normalized against the reference gene; *SDHA*. Quantification was done using the reaction efficiency correction and  $\Delta\Delta Cq$  method. The baseline for each transcripts' in untreated samples were set to 1. Experiment was repeated two independent times with 3 replicas. One-way ANOVA with Tukey's multiple comparison post test was performed using GraphPad Prism (California, USA). \* ( $p \leq 0.05$ ), \*\* ( $p \leq 0.01$ ), and \*\*\* ( $p \leq 0.001$ ) indicates statistical significance.
